# Supplementary material for: Multiple Resistance at No Cost: Rifampicin and Streptomycin a Dangerous Liaison in the Spread of Antibiotic Resistance
Source: PubMed Central journal article supplement — Mol Biol Evol. 2015 Jun 30;32(10):2675–80. doi: 10.1093/molbev/msv143 (PMC4576707; doi:10.1093/molbev/msv143), 2015-06-30
Supplement: supp_msv143_6_Revision1_DuraoTrindadeSousaGordo_sup.pdf [file supp_msv143_6_Revision1_DuraoTrindadeSousaGordo_sup.pdf]

1 **Supplemental Data**

2

3 **Supplemental Figure 1**

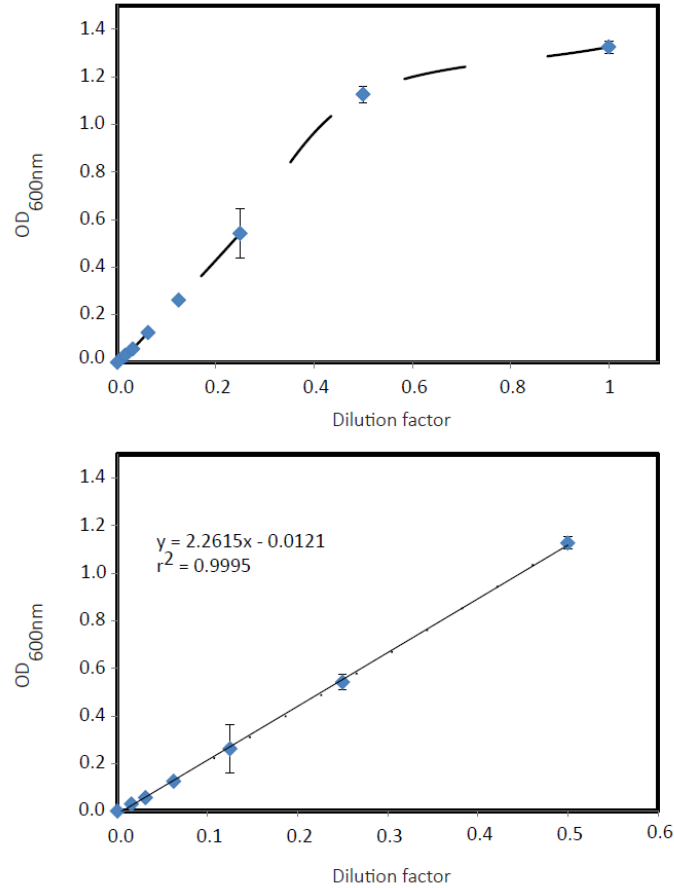

4

5 Figure S1 - Determination of the linear range of the Bioscreen. Using a 24h  
6 growth overnight in LB we performed a series of 1:2 dilutions to determine the  
7 linear range of the BioScreen. The correlation is lost when OD<sub>600nm</sub> > 1 and thus,  
8 dilutions were performed to determine the correct carrying capacity of the  
9 strains in LB. In the growths performed in MM, the carrying capacity was always  
10 below 1 and thus, dilutions were not necessary.

11

12

13

14 Supplemental Figure 2

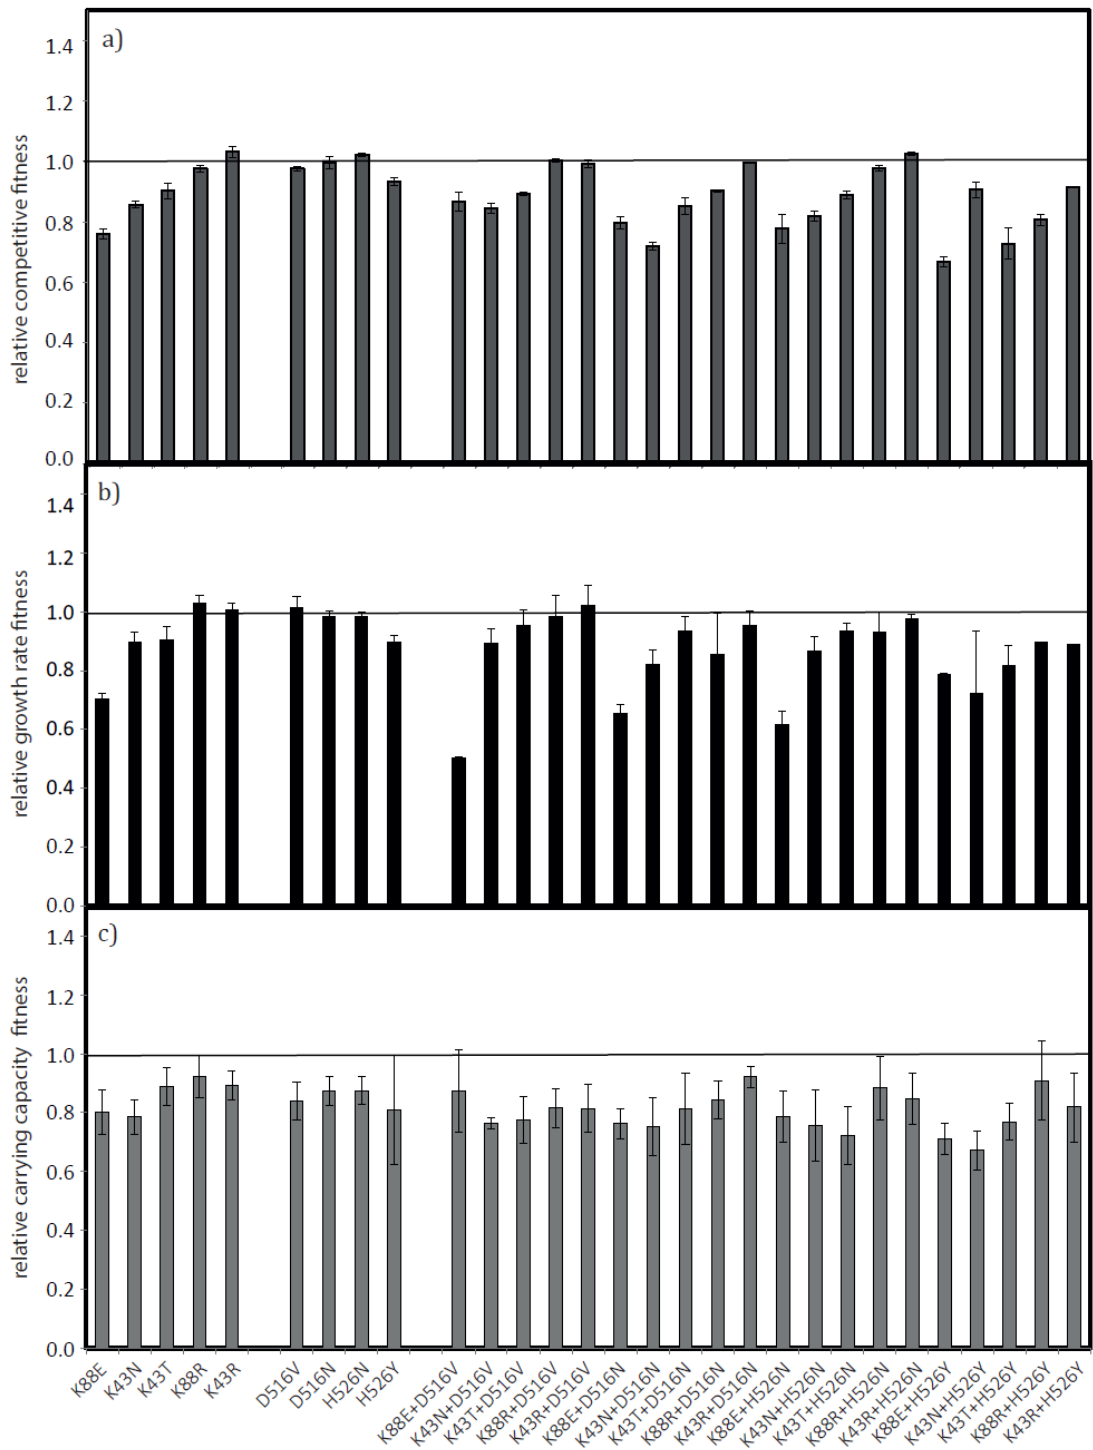

15

16 Fig S2 – Relative fitness of single and double mutants in LB as measured by (a)  
17 competitive fitness assays, (b) growth rates and (c) carrying capacity.

18

Supplemental Figure 3

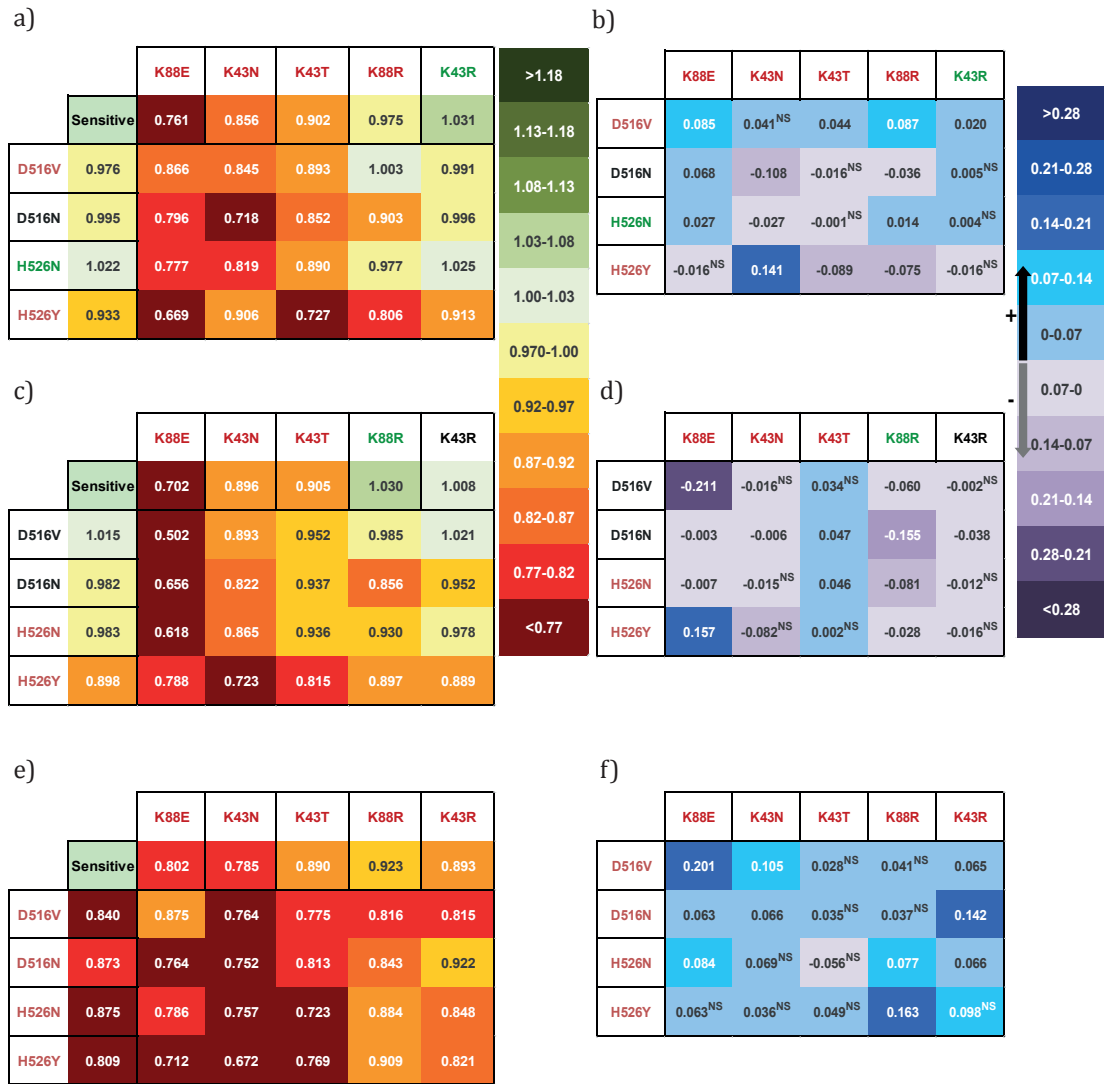

19

20 Fig S3 –Level of pairwise epistasis between Rif<sup>R</sup> and Str<sup>R</sup> alleles in LB for (a)  
 21 competitive fitness, (b) maximum growth rate and (c) for carrying capacity.

22
